# Supplementary material for: Involvement of Yes-Associated Protein 1 Activation in the Matrix Degradation of Human-Induced-Pluripotent-Stem-Cell-Derived Chondrocytes Induced by T-2 Toxin and Deoxynivalenol Alone and in Combination
Source: MDPI journal article supplement (doi:10.3390/ijms25020878), 2024-01-10

**Supplementary files: Original figures for Western Blotting.**

**Figure 2F:**

**Caption: from left to right:**

**Control, T-2, DON, T-2+DON    Control, T-2, DON, T-2+DON**

**$\beta$ - actin (N-hiPS-Ch).**

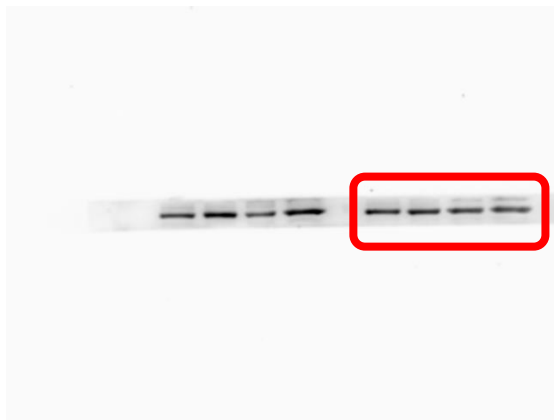

**$\beta$ - actin (KBD-hiPS-Ch).**

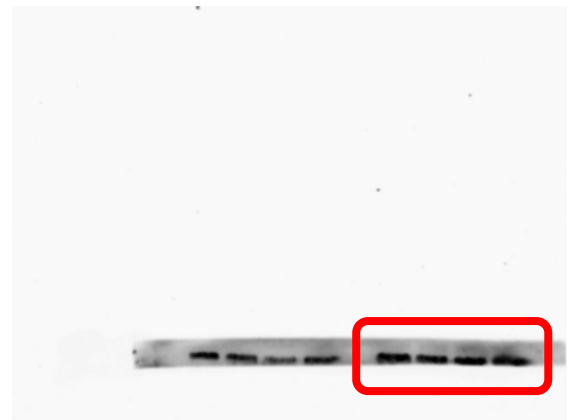

**SOX9(N-hiPS-Ch)**

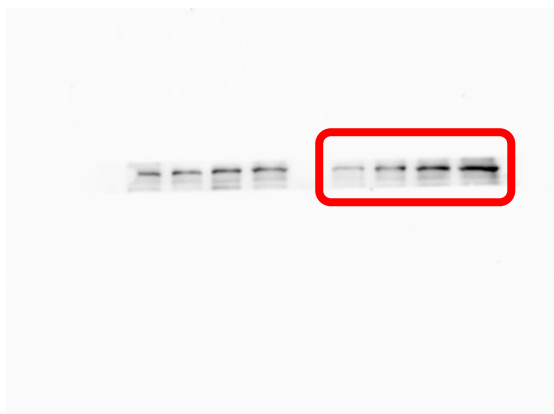

**SOX9(KBD-hiPS-Ch).**

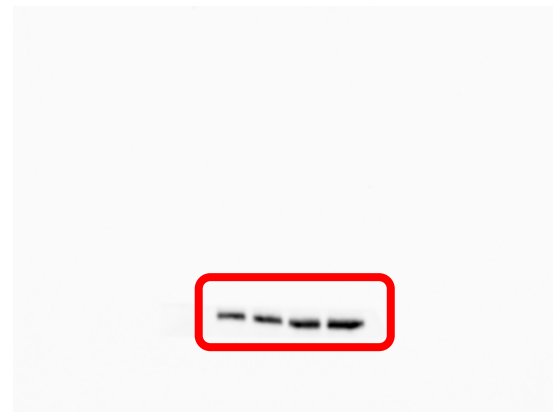

**COL2A1(N-hiPS-Ch).**

**COL2A1(KBD-hiPS-Ch)**

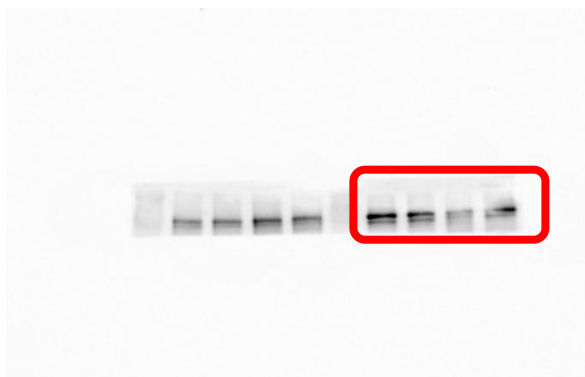

MMP13 (N-hiPS-Ch)

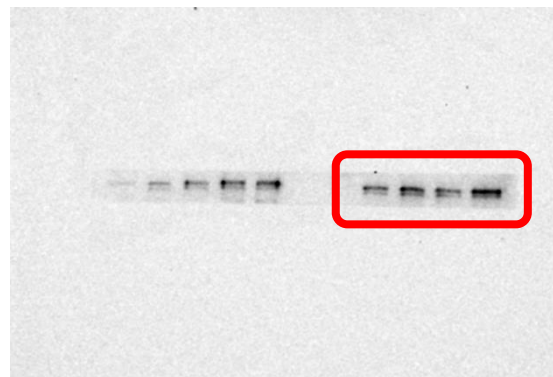

MMP13(KBD-hiPS-Ch)

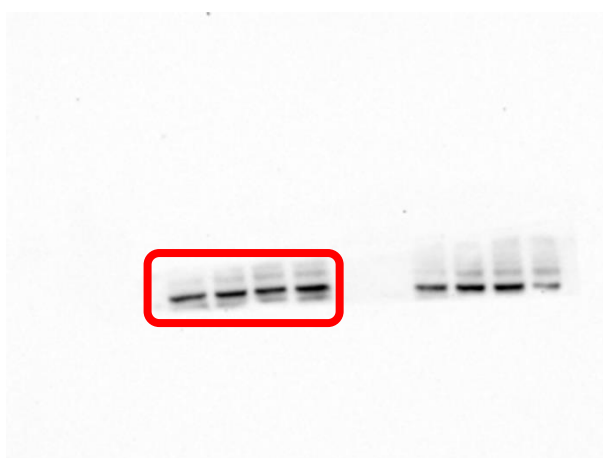

**Figure 3F:**

**Caption: from left to right:**

**Control, T-2, DON, T-2+DON    Control, T-2, DON, T-2+DON**

**$\beta$ - actin(N-hiPS-Ch)**

**$\beta$ - actin (KBD-hiPS-Ch)**

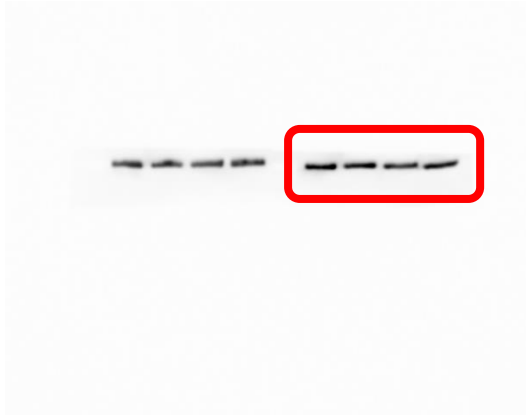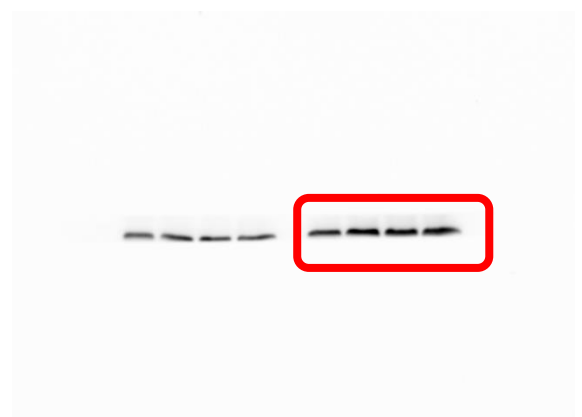

YAP (N-hiPS-Ch)

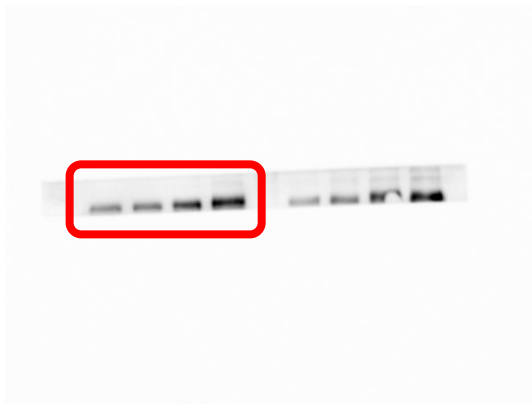

YAP (KBD-hiPS-Ch)

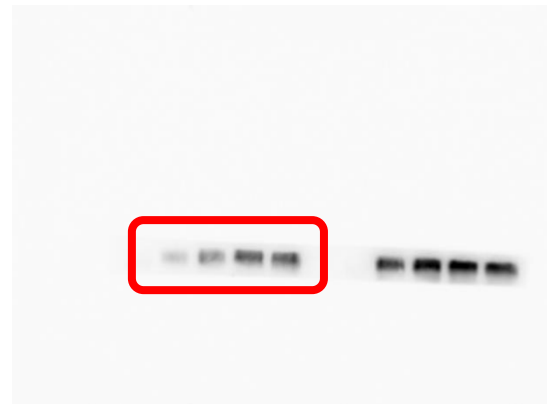

P-YAP(N-hiPS-Ch)

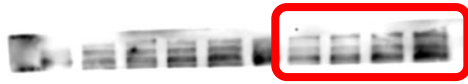

P-YAP(KBD-hiPS-Ch)

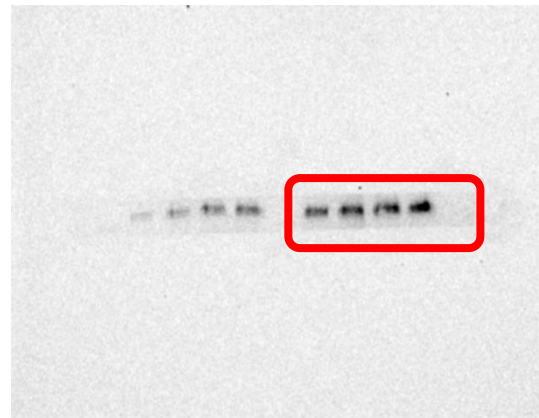

**Figure 4F**

**Caption: from left to right:**

**Verteporfin( $\mu\text{mol/L}$ ) 0, 2, 5, 10      0, 2, 5, 10.**

**$\beta$ - actin (N-hiPS-Ch)**

**$\beta$ - actin (KBD-hiPS-Ch)**

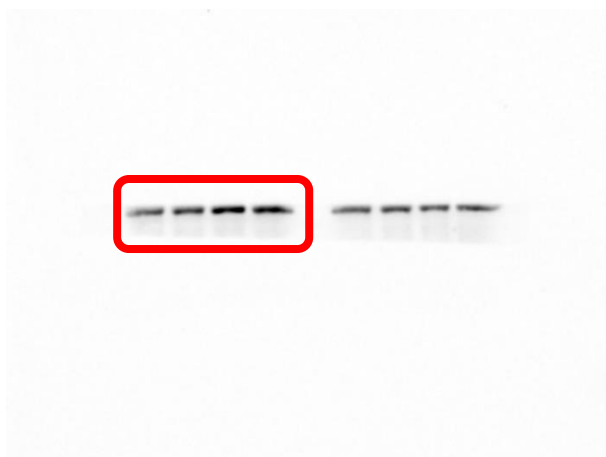

YAP(N-hiPS-Ch)

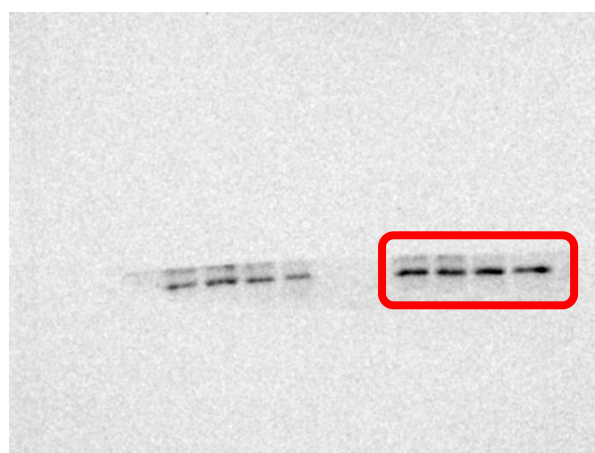

YAP(KBD-hiPS-Ch)

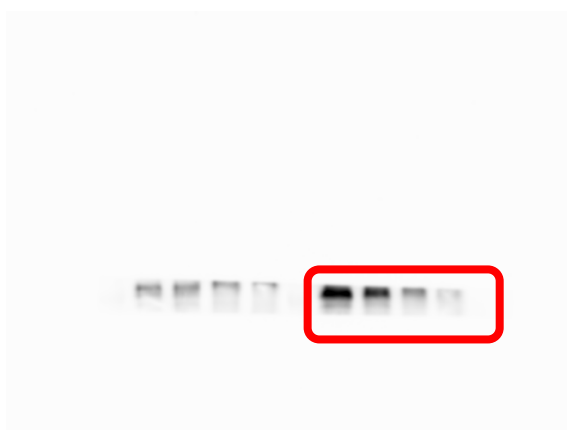

P-YAP (N-hiPS-Ch)

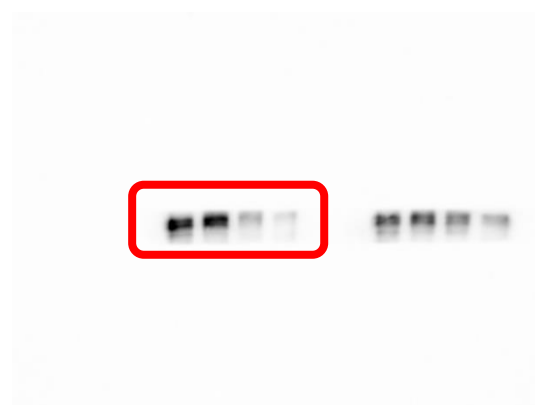

P-YAP (KBD-hiPS-Ch)

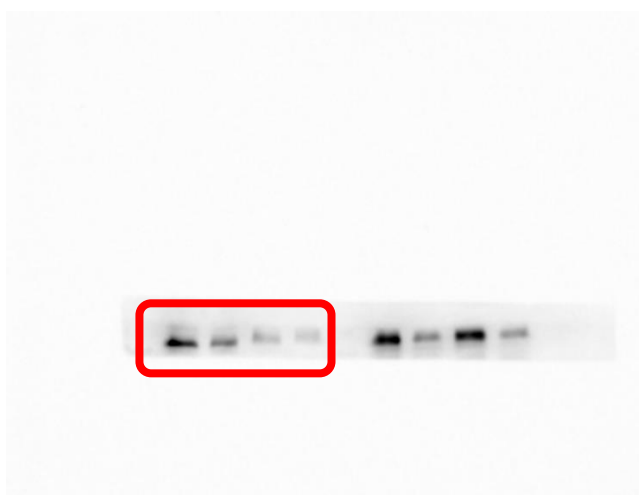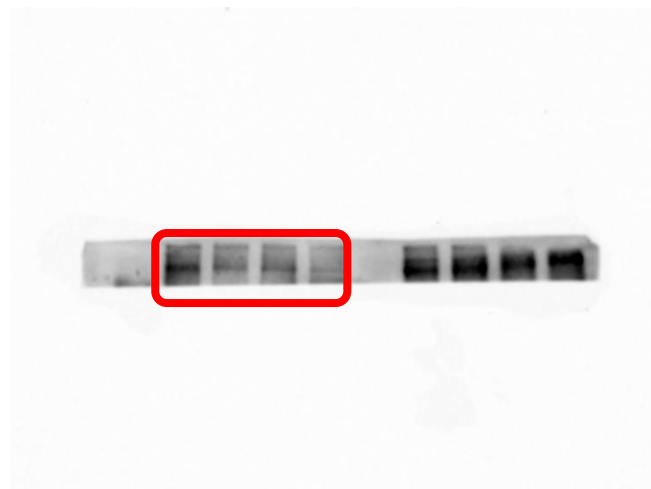

**Figure 4G**

**Caption: from left to right:**

**Verteporfin( $\mu\text{mol/L}$ ) 0, 2, 5, 10**

**0, 2, 5, 10.**

**$\beta$ - actin (N-hiPS-Ch)**

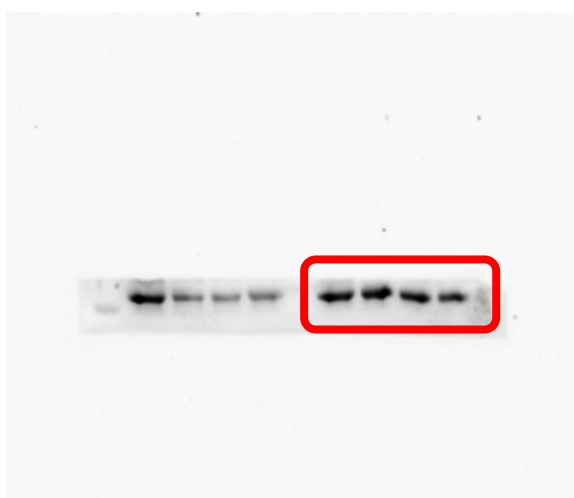

**SOX9(N-hiPS-Ch)**

**$\beta$ - actin (KBD-hiPS-Ch)**

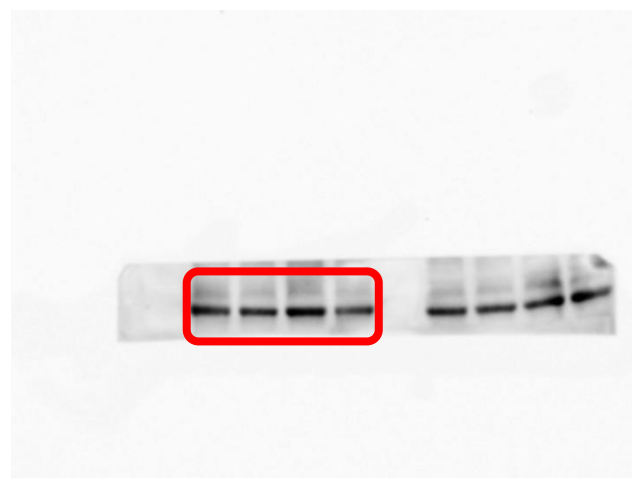

**SOX9(KBD-hiPS-Ch)**

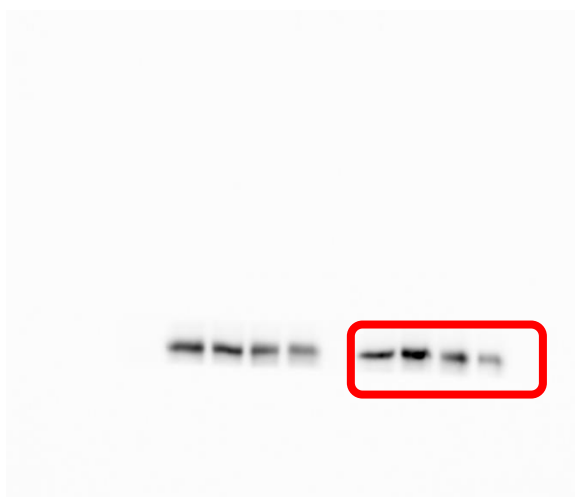

COL2A1(N-hiPS-Ch)

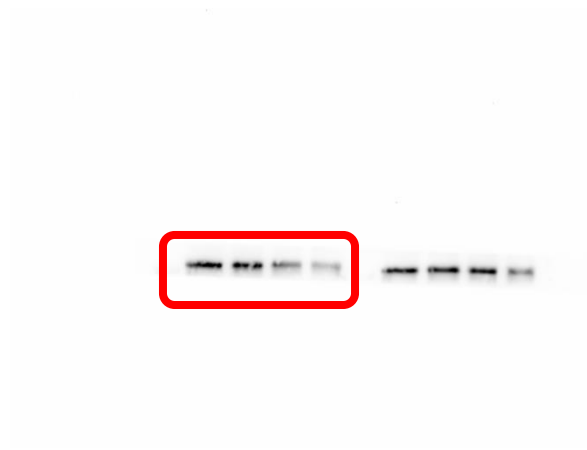

COL2A1(KBD-hiPS-Ch)

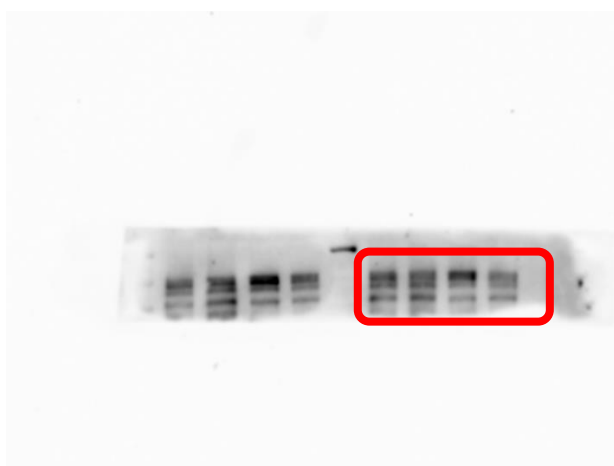

MMP13(N-hiPS-Ch)

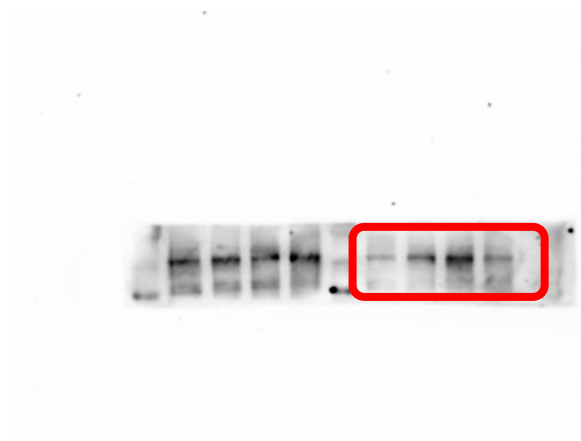

MMP13(KBD-hiPS-Ch)

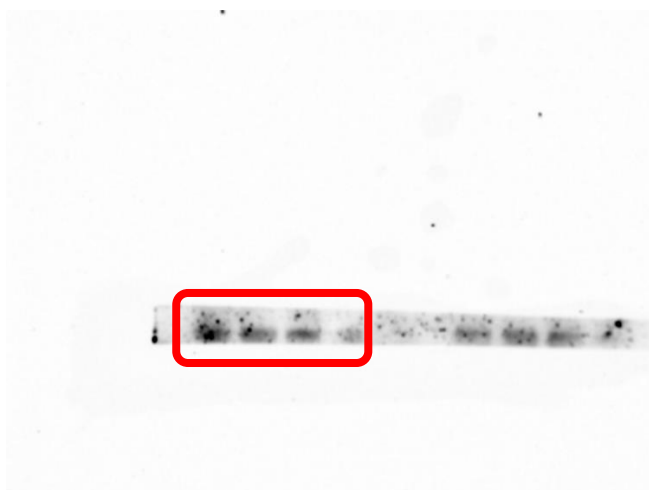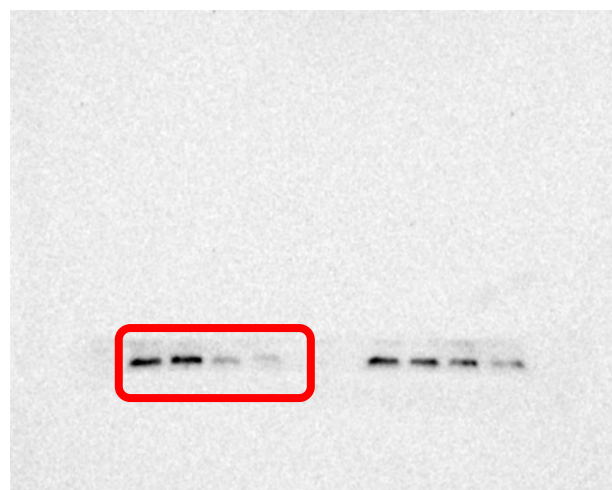

Supplement: s1 [file Supplementary file S2.pdf › Supplementary file S2.pdf]
