# Supplementary material for: Involvement of Yes-Associated Protein 1 Activation in the Matrix Degradation of Human-Induced-Pluripotent-Stem-Cell-Derived Chondrocytes Induced by T-2 Toxin and Deoxynivalenol Alone and in Combination
Source: MDPI journal article supplement (doi:10.3390/ijms25020878), 2024-01-10

## Supplementary files for flow cytometry results of Figure 1.

### (1) Normal-hiPSC-ch

#### 1. Untarget

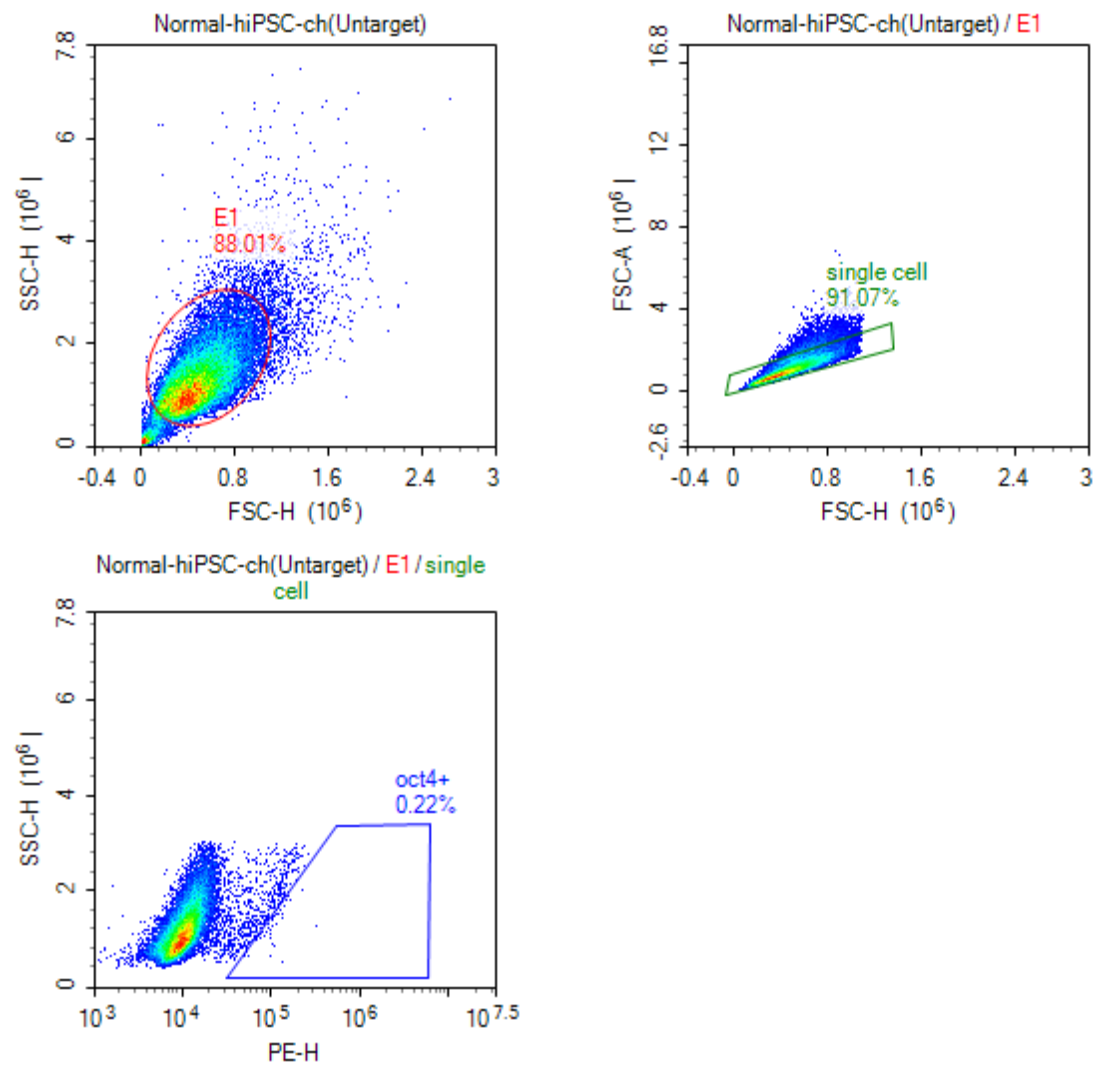

#### 2. Isotype control

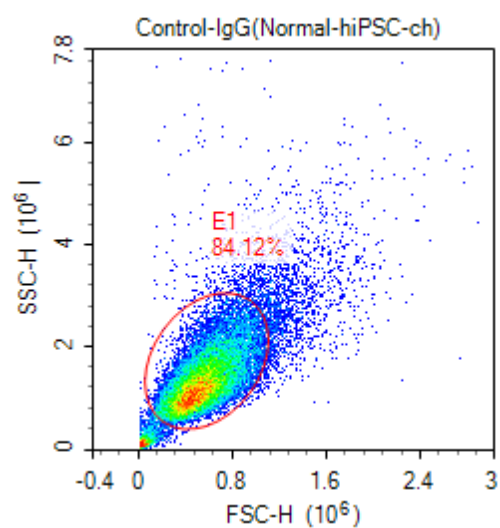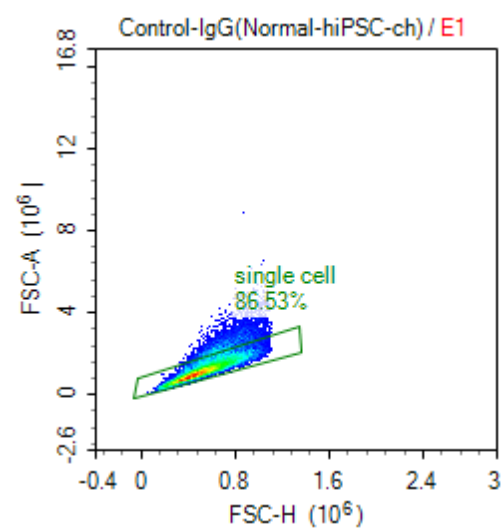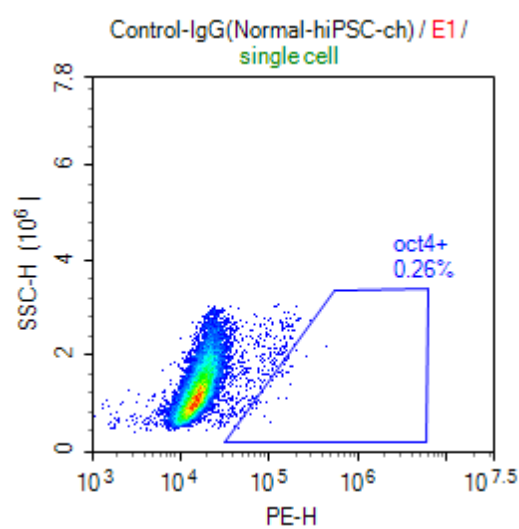

### 3. OCT4+

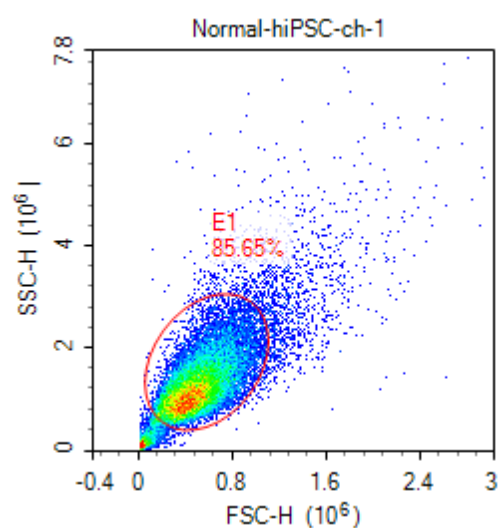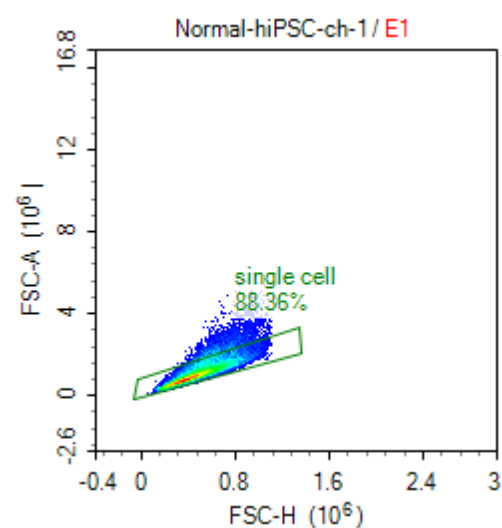

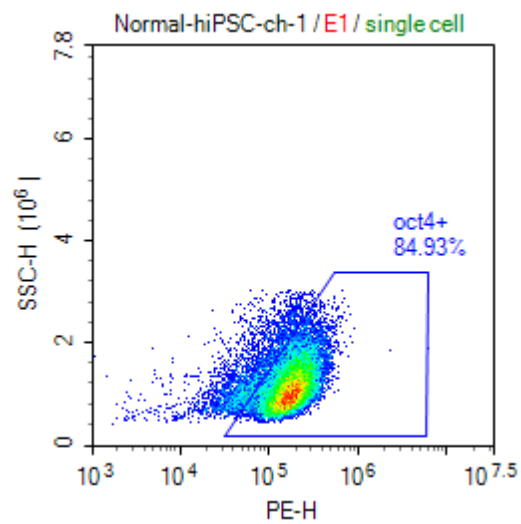

## (2) KBD-hiPSCs-ch

### 1. Untarget

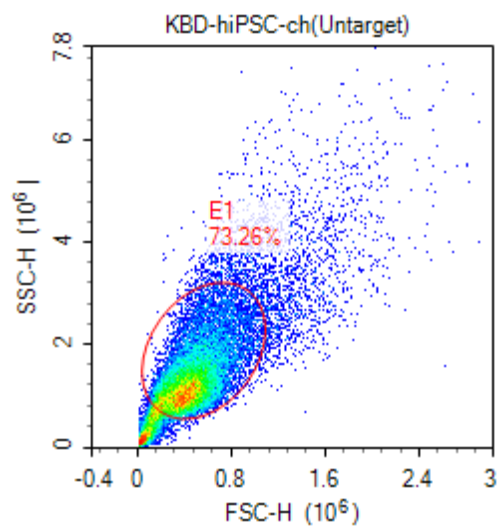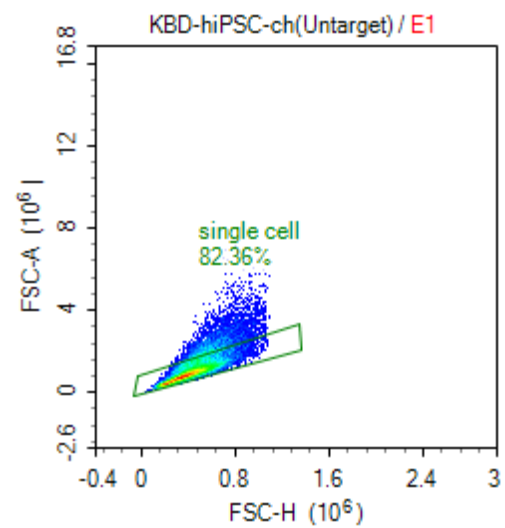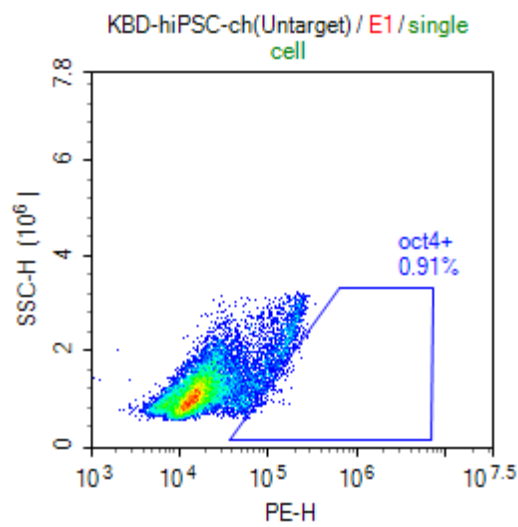

### 2. Isotype control

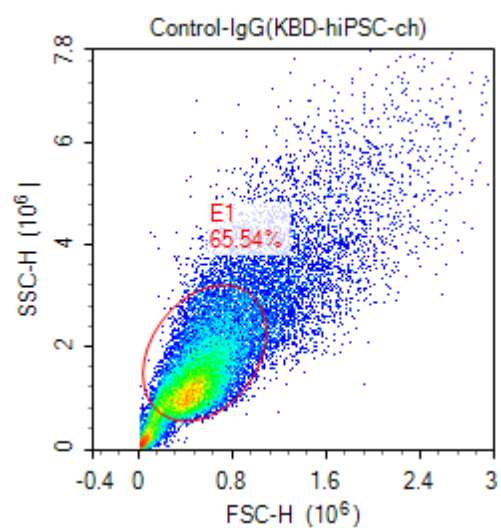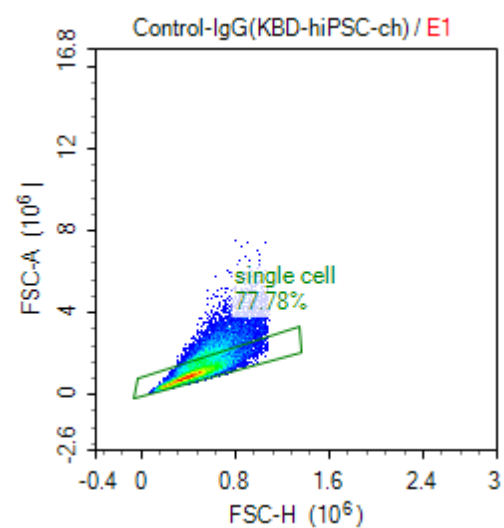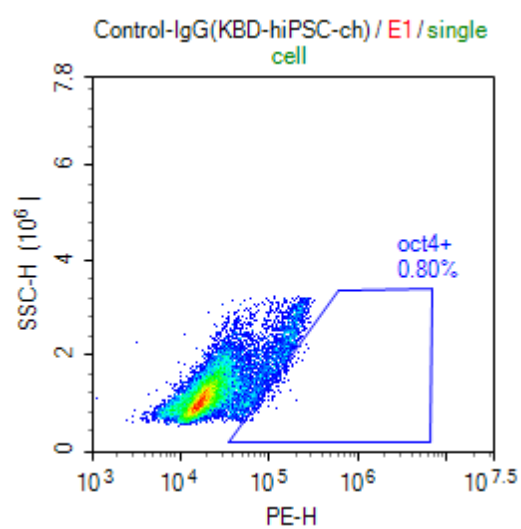

### 3. OCT4+

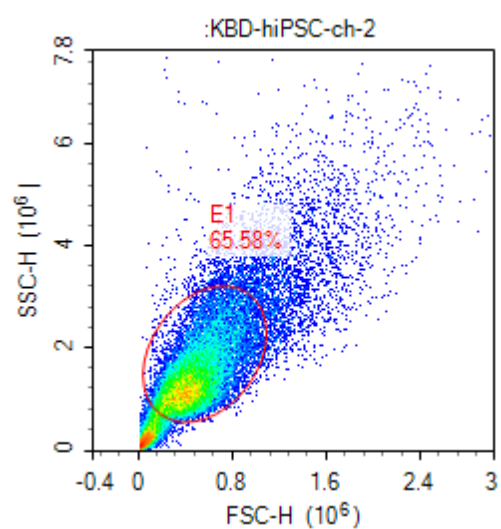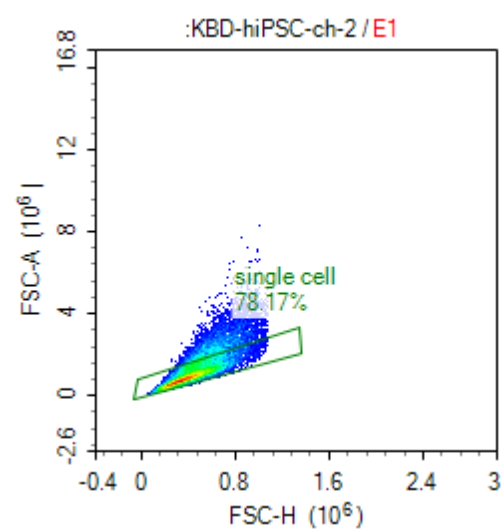

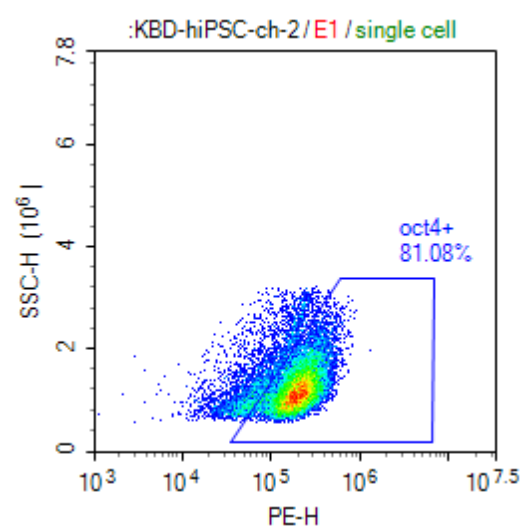

Supplement: s1 [file Supplementary file S1.pdf › Supplementary file S1.pdf]
